# Supplementary material
Source: PubMed Central journal article supplement (PMC4808608)
Supplement: NIHMS759365-supplement-01.pdf [file NIHMS759365-supplement-01.pdf]

**HICDA Codes used**

0650-0664 Full-term delivery of livebirth or stillbirth and premature delivery of livebirth or stillbirth after 20 weeks of gestation

4000-4050 Hypertension, malignant, accelerated

06370-06379 Preeclampsia, eclampsia, HELLP, toxemia

06330-06339 Intrauterine death

06343-06344 Intrauterine growth retardation

06352 Infarction, placental

06353 Insufficiency, placental (mother's history)

07600-07603 Premature infant, preterm

07640 Fetal distress before labor

07649 Birth asphyxia, unspecified

07747 High blood pressure, labile blood pressure

07756 Edema, swelling fluid retention

07700 Coma

07703 Convulsion, seizure

07733 Hyperreflexia, abnormal reflexes
